# Supplementary material for: In Vitro and In Vivo Studies of a Verapamil-Containing Gastroretentive Solid Foam Capsule
Source: MDPI journal article supplement (doi:10.3390/pharmaceutics14020350), 2022-02-02
Supplement: s1 [file s1]

# Supplementary Materials: In Vitro and In Vivo Studies of a Verapamil-Containing Gastroretentive Solid Foam Capsule

Ádám Haimhoffer, Gábor Vasvári, István Budai, Monika Béresová, Ádám Deák, Norbert Németh, Judit Váradi, Dávid Sinka, Ildikó Bácskay, Ferenc Fenyvesi

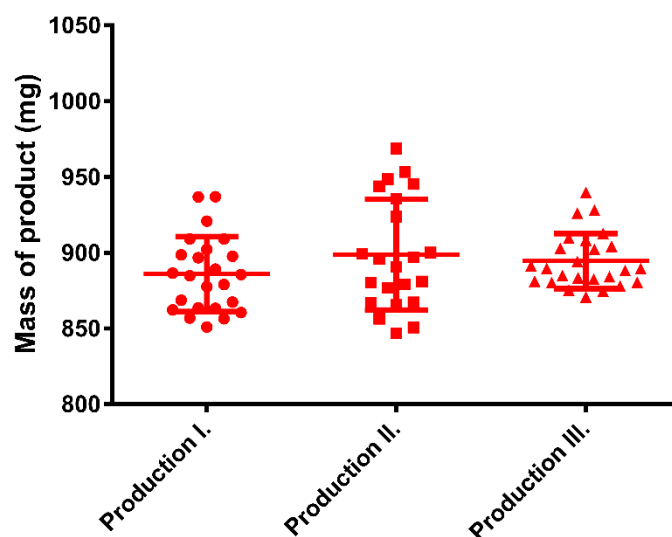

**Figure S1.** Weight validation of V2 product. Data present the measured weight, average weight, and standard deviations.

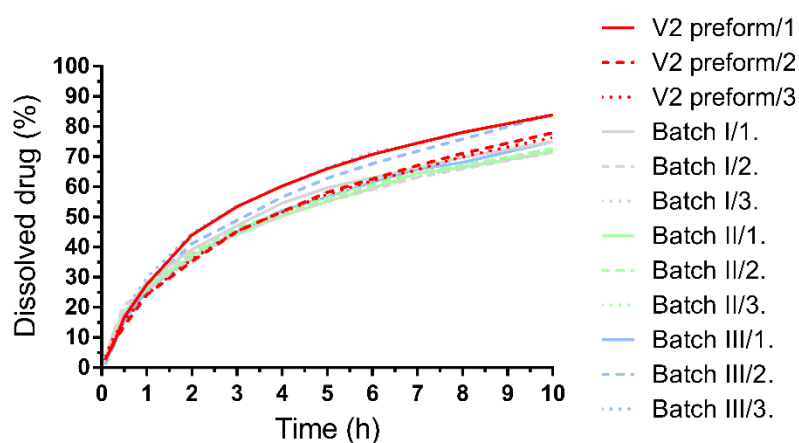

**Figure S2.** The dissolution profiles of batches and V2 preformulation.

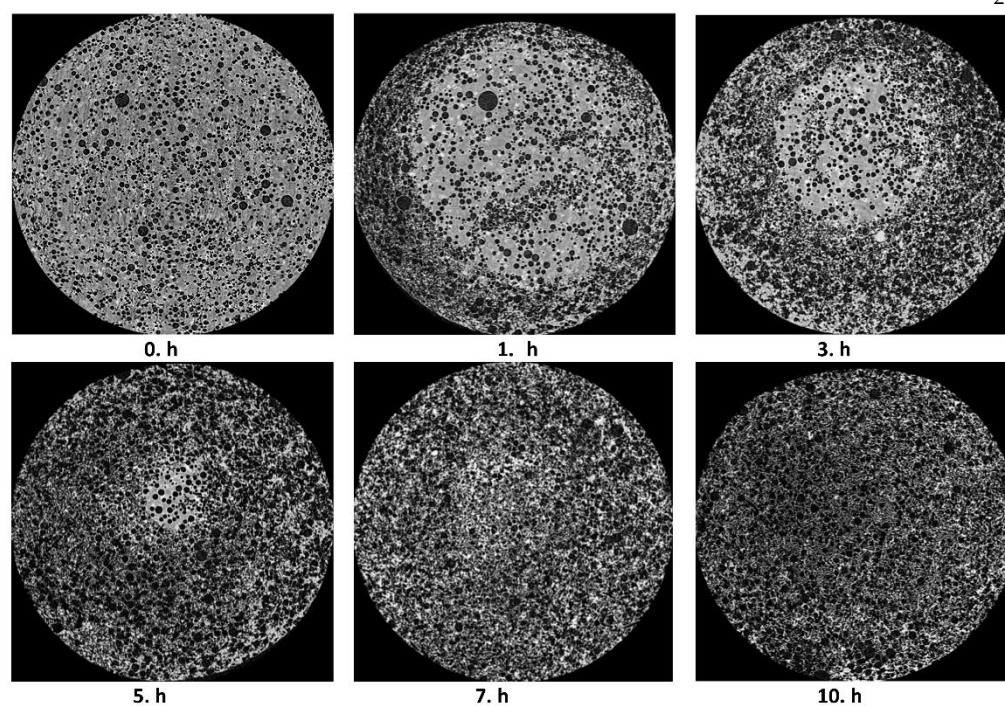

**Figure S3.** Micro-CT scans of matrix erosion during dissolution.

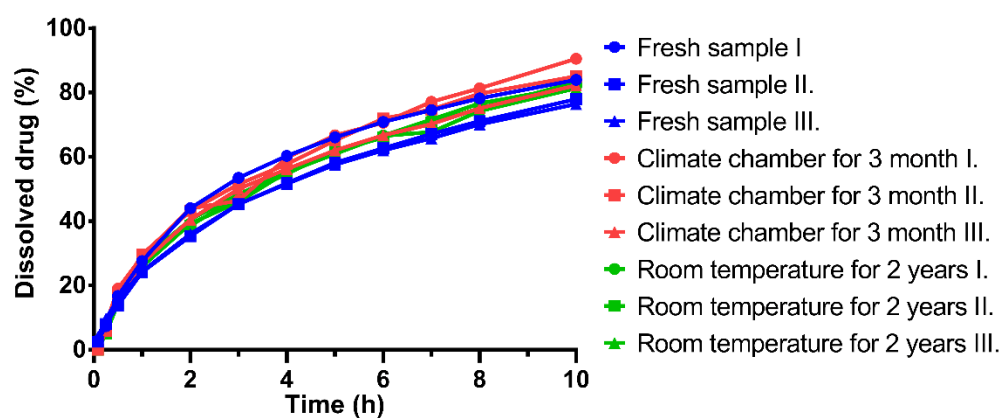

**Figure S4.** Three parallel dissolution studies of fresh sample, after 3 months in climate chamber and after 2 years at room temperature.

**Table S1.** The dissolution profile of stability test was compared by similarity and difference factors.

| Validation Properties          | 3 Months | 2 Years |
|--------------------------------|----------|---------|
| Difference factor <sup>1</sup> | 6.27     | 1.80    |
| Similarity factor <sup>1</sup> | 61.80    | 71.74   |

<sup>1</sup> compare to the fresh sample

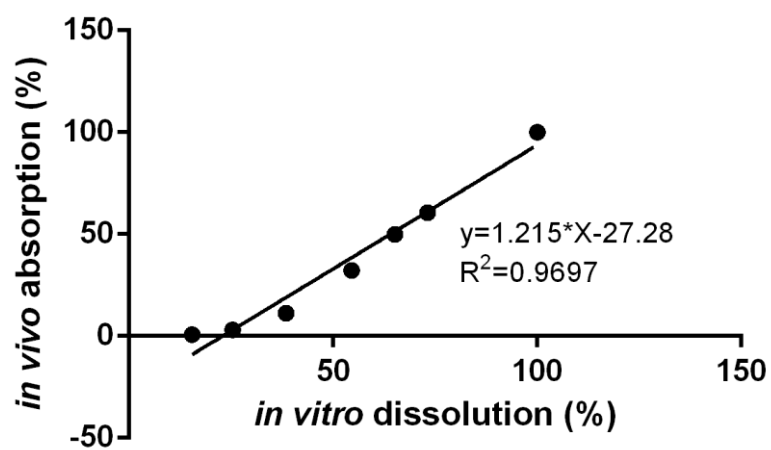

Figure S5. In vitro–in vivo correlation of formulation V2.
